# Supplementary material for: A rapid and specific bacterial detection method based on cell-imprinted microplates
Source: Royal Society of Chemistry journal article supplement (doi:10.1039/c7an02057k), 2018-01-01
Supplement: c7an02057k1.pdf [file c7an02057k1.pdf]

**Electronic Supplementary Information**

**A rapid and specific bacterial detection method based on cell-imprinted microplates**

Xueling Shan,<sup>a</sup> Takuya Yamauchi,<sup>a</sup> Yojiro Yamamoto,<sup>a,b</sup> Hiroshi Shiigi\*,<sup>a</sup> and Tsutomu Nagaoka<sup>a</sup>

<sup>a</sup> Department of Applied Chemistry, Osaka Prefecture University, 1-2 Gakuen, Naka, Sakai, Osaka 599-8570, Japan

<sup>b</sup> GreenChem. Inc., 19-19 Tsuruta, Nishi, Sakai, Osaka 593-8323, Japan

Table of contents

Fig. S1

Fig. S2

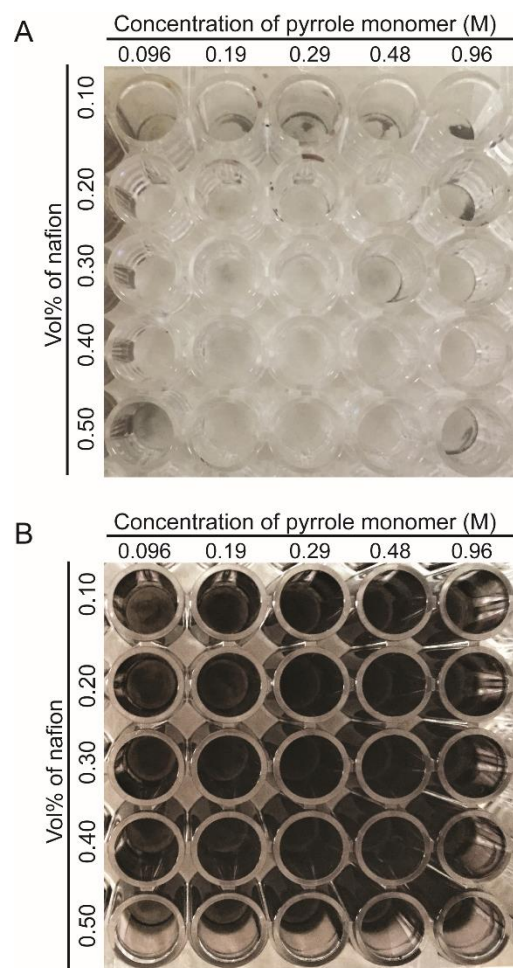

**Fig. S1** Photograph of (A) carboxy-functionalized and (B) Au NP-coated 96-well microplates after coating with the cell-imprinted polymer. The polymerization conditions are indicated in the figure.

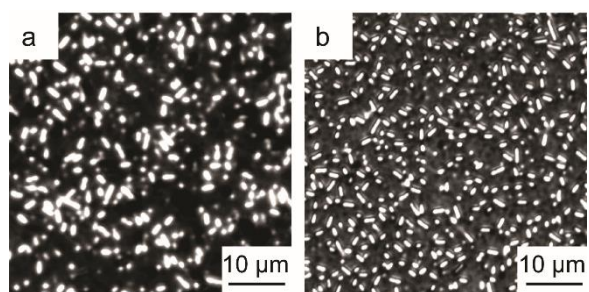

**Fig. S2** Bright-field microscopy images of the polymer complex formed at the bottom of the well (A) before and (B) after overoxidation.
